# Supplementary material for: Integrative In Silico and In Vitro Transcriptomics Analysis Revealed Gene Expression Changes and Oncogenic Features of Normal Cholangiocytes after Chronic Alcohol Exposure
Source: MDPI journal article supplement (doi:10.3390/ijms20235987), 2019-11-28

**Figure S1.** Detail information of western blot analysis

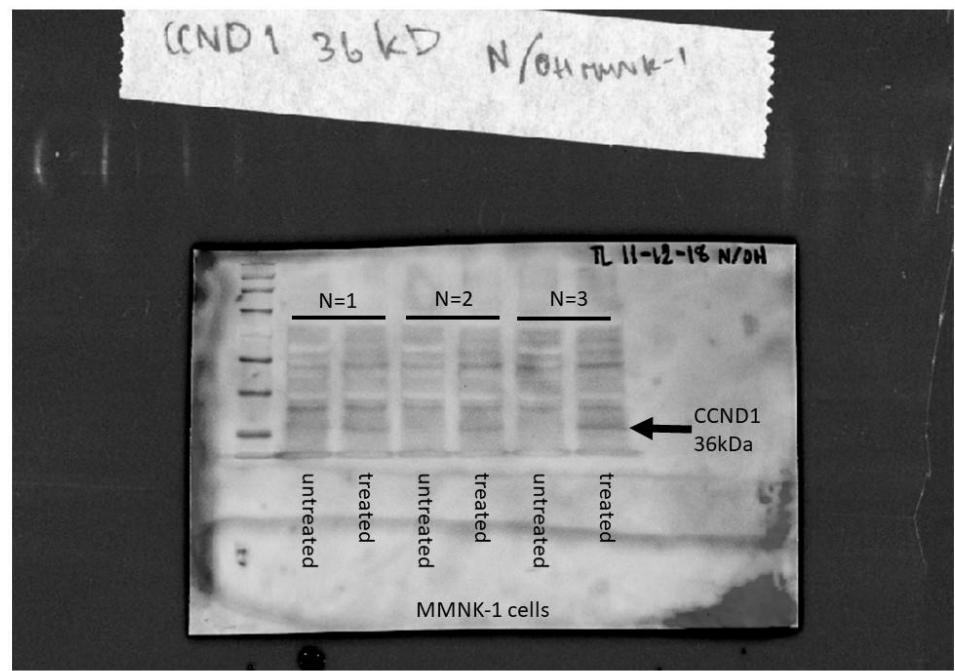

| CCND-1 expression |           |             |           |             |           |             |             |             |
|-------------------|-----------|-------------|-----------|-------------|-----------|-------------|-------------|-------------|
|                   | N=1       |             | N=2       |             | N=3       |             | Average     |             |
|                   | Untreated | Oh-treated  | Untreated | Oh-treated  | Untreated | Oh-treated  | Untreated   | Oh-treated  |
| Density           | 402556    | 1213036     | 533808    | 948992      | 556428    | 1284272     | 497597.3333 | 1148766.667 |
| ratio             | 1         | 3.013334791 | 1         | 1.777777778 | 1         | 2.308065015 | 1           | 2.308627056 |

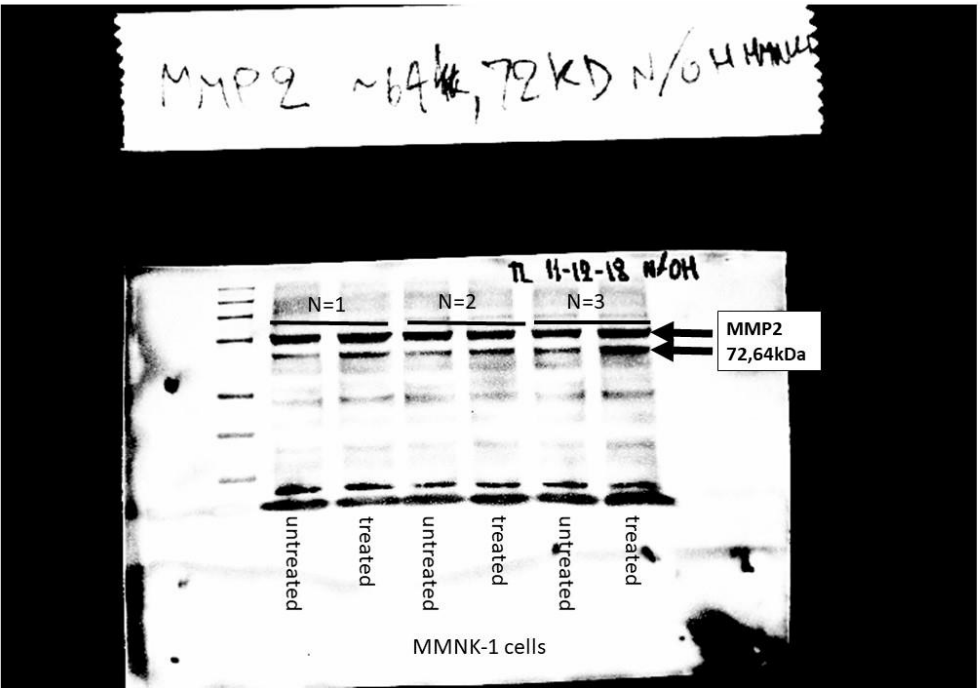

| MMP-2 expression |           |             |           |             |           |            |           |            |
|------------------|-----------|-------------|-----------|-------------|-----------|------------|-----------|------------|
|                  | N=1       |             | N=2       |             | N=3       |            | Average   |            |
|                  | Untreated | Oh-treated  | Untreated | Oh-treated  | Untreated | Oh-treated | Untreated | Oh-treated |
| Density          | 1612864   | 1826000     | 1471096   | 1723084     | 1687224   | 3046516    | 1590394.7 | 2198533.33 |
| ratio            | 1         | 1.132147534 | 1         | 1.171292696 | 1         | 1.80563814 | 1         | 1.38238223 |

$\beta$ -Actin 42kD 13-12-18  
TZ N/OH TREAT.

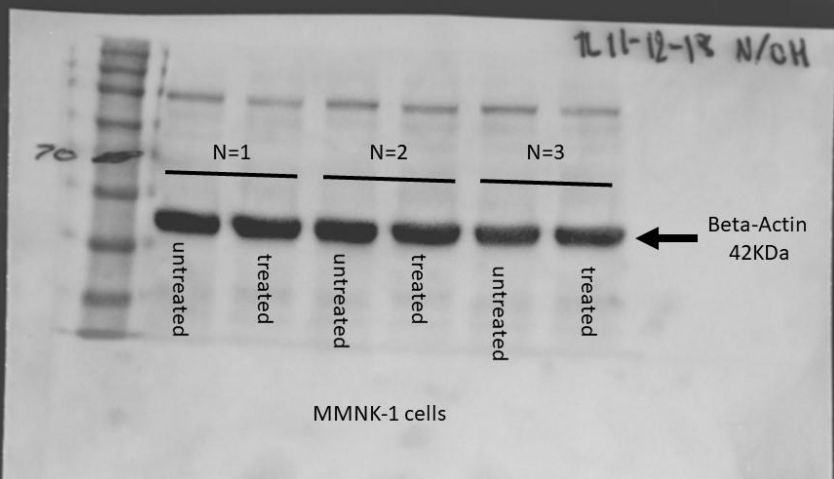

Supplement: s1 [file s1]
